# Supplementary material for: Facile Photochemical Synthesis and Characterization of Highly Luminescent Gold Nanoparticles as Versatile Probes for Bioimaging Applications
Source: Research Square preprint supplement (doi:10.21203/rs.3.rs-4197469/v1), 2024-04-11
Supplement: Supplementary file 1 [file c91c9b50631e485f2b1098ca.docx]

**Facile Photochemical Synthesis and Characterization of Highly Luminescent Gold Nanoparticles as Versatile Probes for Bioimaging Applications**

Lulu Yang1,#, Feihong Yan2,3,#, Shengcang Zhu2,3, Helin Liu4, Jianhai Wang1, Lijun Wang1, Yuankai Hong1, Limin Fu5, Jianping Zhang5, Xia Chen2,3, Xiaojing Song6, Weibo Zhang6, Rongcheng Han2,3,*, Yuqiang Jiang2,3,*, Yinlin Sha1,*, Zhiyong Liu7,*

1Single-Molecule and Nanobiology Laboratory, Department of Biochemistry and Biophysics, School of Basic Medical Sciences, Peking University, 100083 Beijing, China.

2 State Key Laboratory of Molecular Developmental Biology, Institute of Genetics and Developmental Biology, Chinese Academy of Sciences, 100101 Beijing, China.

3 University of Chinese Academy of Sciences, Beijing 100049, China.

4 Liver Research Center, Beijing Friendship Hospital, Capital Medical University, 100050 Beijing, China.

5 Department of Chemistry, Renmin University of China, 100872 Beijing, China.

6 Department of Biomedical Engineering, Institute of Acupuncture and Moxibustion, China Academy of Chinese Medical Sciences, 100700 Beijing, China.

7 Department of Urology, Changhai Hospital, Second Military Medical University, 200433 Shanghai, China.

# These authors contributed equally.

*E-mail: hanrch@genetics.ac.cn; yqjiang@genetics.ac.cn; shyl@hsc.pku.edu.cn; [medlzhy@aliyun.com](mailto:medlzhy@aliyun.com).

**1 Materials and methods**

**1.1** **Chemicals**

Chloroauric acid hydrated (HAuCl4·4H2O) and sodium borohydride (NaBH4, 98%) were purchased from Shanghai Aladdin Bio-Chem Technology Co., LTD. 2-*n*-Hexylthio-1,3,4-thiadiazole-5-thiol (HTT, 97%) and (5-mercapto-1,3,4-thiadiazole-2-ylthio) acetic acid (MTY, 96%) were purchased from Alfa Aesar Co. (USA). Trichloromethane (CHCl3, 99%), ethanol (C2H5OH, 99.7%), sodium hydroxide (NaOH, 97%) were purchased from Beijing Chemical Works. Fluorescein (CHNa₂O₅, 99%) was purchased from Shanghai Aladdin Bio-Chem Technology Co., LTD. Poly (methyl methacrylate-co-methacrylic acid) (PMMA-co-MAA) was purchased from Sigma-Aldrich Corporation. DHLA (C8H16O2S2) was synthesized independently in our laboratory.

1.2 Instruments

Photoluminescence (PL) and UV-vis absorption spectra were obtained on the HITACHI F-4500 fluorescence spectrometer and TU-1901 UV-visible spectrometer, respectively. High Resolution Transmission electron microscopy (HRTEM) was conducted by TECNAI F30 Field Emission Gun Transmission Electron Microscope, the acceleration voltage was 300 kV. X-ray photoelectron spectroscopy (XPS) was performed with AXIS ULTRA DLD system by utilizing adventitious carbon to calibrate the binding energy of C1s (284.8 eV). Luminescence lifetimes were measured by Delta flex Ultrafast Lifetime Spectrofluorometer with the time-correlated single photon counting (TCSPC), and the wavelength of light source was 405 nm. Two-photon absorption cross-sections were measured by two photon luminescence method at femtosecond laser pulse by Ti:sapphire system (720-900 nm, 80 MHz, < 130 fs) as the light source, and the fluorescein in NaOH aqueous solution as the reference1, 2. For this research, one-photon experiments were performed on a Zeiss Axio Observer Z1 optical system; Two-photon experiments were conducted with a Zeiss LSM 780 NLO optical system, equipped with tunable Ti:sapphire laser (Mai Tai HP DS, wavelength = 690 to 1040 nm; repetition rate = 80 MHz) and 800 nm fs laser as the excitation.

**1.3** **Photochemical synthesis of L-AuNP@HTT in TCM/EtOH**

The reaction solvent was a mixed system of trichloromethane (TCM, 90%) and EtOH (10%) (*v/v*). The protocol used was similar to that established in the synthesis of L-AuNP@HTT, except for the NaOH removal.

**1.4** **Photochemical synthesis of L-AuNP@HTT in TCM**

The protocol used was similar to that established in the synthesis of L-AuNP@HTT, except for the EtOH removal.

**1.5 The kinetic process of photochemical reduction of Au(I)-HTT complex under different light wavelength**

The F-4500 fluorescence spectrophotometer was used to record the time course of PL intensity changes at 528 nm during 3600 s, and the excitation wavelengths were set at 242 nm, 279 nm, 323 nm, 350 nm, 365 nm, 390 nm and 420 nm, respectively. The temperature was set at 25 °C.

**1.6 The kinetic process of photochemical reduction of Au(I)-HTT complex with 390 nm light**

Utilizing the F-4500 fluorescence spectrophotometer, the reaction system was conducted to the time-course measurements of the photoluminescence evolution from 0 h to 62 h. The emission wavelength was set at 528 nm, and the excitation wavelength was set at 420 nm. The temperature was set at 25 °C.

**1.7 Determination the QYof L-AuNP@HTT and p-AuNPs3**

(S4)

The PL and absorption spectra of different concentrated standard references, L-AuNP@HTT and p-AuNPs solution under identical excitation wavelength were measured (20 °C), involving linear dependence of PL integrated areas and corresponding absorption. Calculating *QY* according to equation (S1).

The standard reference is fluorescein, the *QY* is 0.95 in NaOH aqueous solution (0.1 M). The *k* is the slope. *RI* is the refractive index of a solvent: water 1.33, trichloromethane 1.45, and ethanol 1.36.

**1.8 Photostability of L-AuNP@HTT**

L-AuNP@HTT was irradiated continuously under 405 nm for 1800 s using the F-4500 fluorescence spectrophotometer, and the excitation slit was opened to a maximum (25 °C).

**1.9 Thermal gravimetric analysis (TGA) of L-AuNP@HTT**

TGA spectrum of L-AuNP@HTT was characterized under the protection of nitrogen and the heating rate was 10 °C.min-1 ranging from 25 °C to 600 °C. The weight ratio of HTT was 48.4% in L-AuNP@HTT.

**1.10 Calculation of the average molecular formula of L-AuNP@HTT**

TGA showed a weight ratio of HTT in L-AuNP@HTT was 48.4%. The relative molecular mass of Au and HTT is 197 and 234, respectively. The molar ratio of Au to HTT was calculated according to equation (S2).

HRTEM imaging showed L-AuNP@HTT had an average diameter of 3.19 ± 0.42 nm. The Au atom number in L-AuNP@HTT was determined according to equation4 (S3).

Therefore, the average molecular formula of L-AuNP@HTT was determined to be Au1002HTT780.

**1.11 Photochemical synthesis of L-AuNP@MTY**

Typically, 1.0 mL HAuCl4 aqueous solution (10 mM) was mixed with 9.0 mL MTY NaOH aqueous solution (2 mM; NaOH, 10 mM). After vigorous stirring for 15 min at 25 °C, the reaction was conducted under 390 nm irradiation. The product was purified by ultrafiltration centrifugation (4000 rpm, 3 KD).

**1.12 Ligand exchange of L-AuNP@MTY**

20 μL DHLA (~50 μmol) was mixed with 1 mL L-AuNP@MTY solution (3.0 mg mL-1) in NaOH aqueous solution. The reaction was conducted under stirring at 37 °C, and was examined by high resolution transmission electron microscopy. Photoluminescence and UV-vis absorption spectra were obtained on the HITACHI F-4500 fluorescence spectrometer and TU-1901 UV-visible spectrometer, respectively.

**1.13 The TPA cross-section (*σ*) of L-AuNP@HTT**

The TPA cross-section (*σ*) of L-AuNP@HTT were measured according to the previously reported method1. Calculating TPA cross-section (*σ*) according to equation (S4).

The standard is Rhodamine B, the *F* is the two-photon excited fluorescence intensity, the *QY* is the quantum yield, the *C* is the concentration, and *n* is the refractive index of solvent.

(S4)

Table S1 Highly luminescent gold nanoparticles have been reported so far.

| Year | Sample | Surface ligand | Synthesis method | Size by TEM  (nm) | Emission  （nm） | QY | Reference |
| --- | --- | --- | --- | --- | --- | --- | --- |
| 1998 | AuNPs |  | sodium citrate reduction | ~5.0 | 440 | ~10-4-10-5 | (5) |
| 2008 | MUA-AuNPs | 11-mercaptoundecanoic acid | Surface change with  THPC-AuNPs | 2.1 ± 0.1 | 640 | 0.2% | (6) |
| 2011 | GC-AuNPs | Glutathione and cysteamine |  | 2.7 ± 0.5 | 575 | 9% | (7) |
| 2011 | GS-AuNPs | GSH |  | 2.5 ± 0.5 | 810 | 4.7% in DMSO;  1.0% in water | (8) |
| 2013 | PEG1000-AuNPs | thiolated PEG1000 |  | 2.3 | 810 |  | (9) |
| 2016 | GS-AuNPs | GSH |  | 2.6 ± 0.3 | 600 | 5.3% | (10) |
| 2016 | GS-AuNPs | GSH |  | 2.5 ± 0.3 | 810 | 1.1% | (10) |
| 2016 | GS-Au/AgNPs | GSH | thermal reduction | 2.6 ± 0.2 | 700 |  | (11) |
| 2019 | Cys-AuNPs | cysteine |  | 2.35 ± 0.33 | 650 | 0.24% | (12) |
| 2019 | Gly-Cys-AuNPs | glycine–cysteine (Gly–Cys) |  | 2.32 ± 0.19 | 650 | 0.42% | (12) |
| 2019 | 07CR-AuNPs | glutathione  and CR8 | a thermal reduction method | ~2.0 | 810 |  | (13) |
| 2019 | 09CR-AuNPs | glutathione  and CR8 | a thermal reduction method | ~2.0 | 810, 615 |  | (13) |
| 2019 | 13CR-AuNPs | glutathione  and CR8 | a thermal reduction method | ~2.0 | 615 |  | (13) |
| 2019 | MPS-AuNPs | 3-mercapto-1-propanesulfonate  (MPS) | thermal reduction method | 2.5 ± 0.3 | 600, 810 |  | (14) |
| 2019 | MPA-AuNPs | mercaptopropionic acid (MPA) | thermal reduction method | 2.6 ± 0.3 | 600, 810 |  | (14) |
| 2019 | PEG-AuNPs | poly(ethylene glycol)  methyl ether thiol (PEG) | thermal reduction method | 2.1 ± 0.2 | 810 |  | (14) |
| 2021 | MUA-AuNPs | 11-Mercaptoundecanoic acid (MUA) |  | 2.01 ± 0.25 | 610 |  | (15) |
| 2021 | PMIZ-AuNPs | poly(ethylene glycol) methyl ether thiol (PEG-SH), mercaptosuccinic acid (MSA-SH) |  | 1.9 ± 0.3 | 800 |  | (16) |
| 2021 |  | Glutathione GSH | thermal reduction method | ~2.0 | 810, 610 |  | (17) |
| 2021 | polymers PolySC4AP assembled FGGC@AuNPs | polymers PolySC4AP,  FGGC (N-terminal phenylalanine-glycine-glycinecysteine) | NaBH4  reduction method | ~2.0 | 650 | 35.3% | (18) |
| 2023 | AuNPs |  | Pulsed Laser Ablation | 3.4 ± 1.3 | 360 |  | (19) |
| 2023 | DT-AuNPs | 1-dodecanethiol (DT) | ligand-exchange method | ~3.0 | 460, 565, 620 | 1.1%  @460nm | (20) |
| 2024 | L-AuNP@HTT | 2-n-hexylthio-1,3,4-thiadiazole-5-thiol | Photochemical Synthesis | 3.19 ± 0.42 | 528 | 13% | This work |


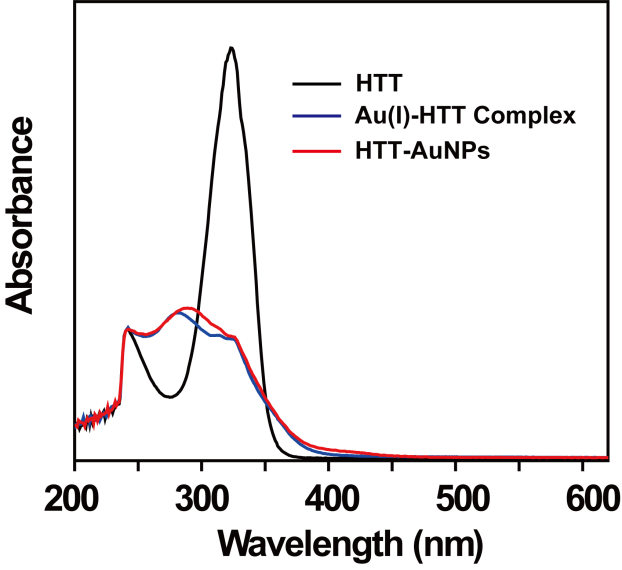


**Fig. S1** Absorption spectra of L-AuNP@HTT, Au(I)-HTT complex and HTT ligands.


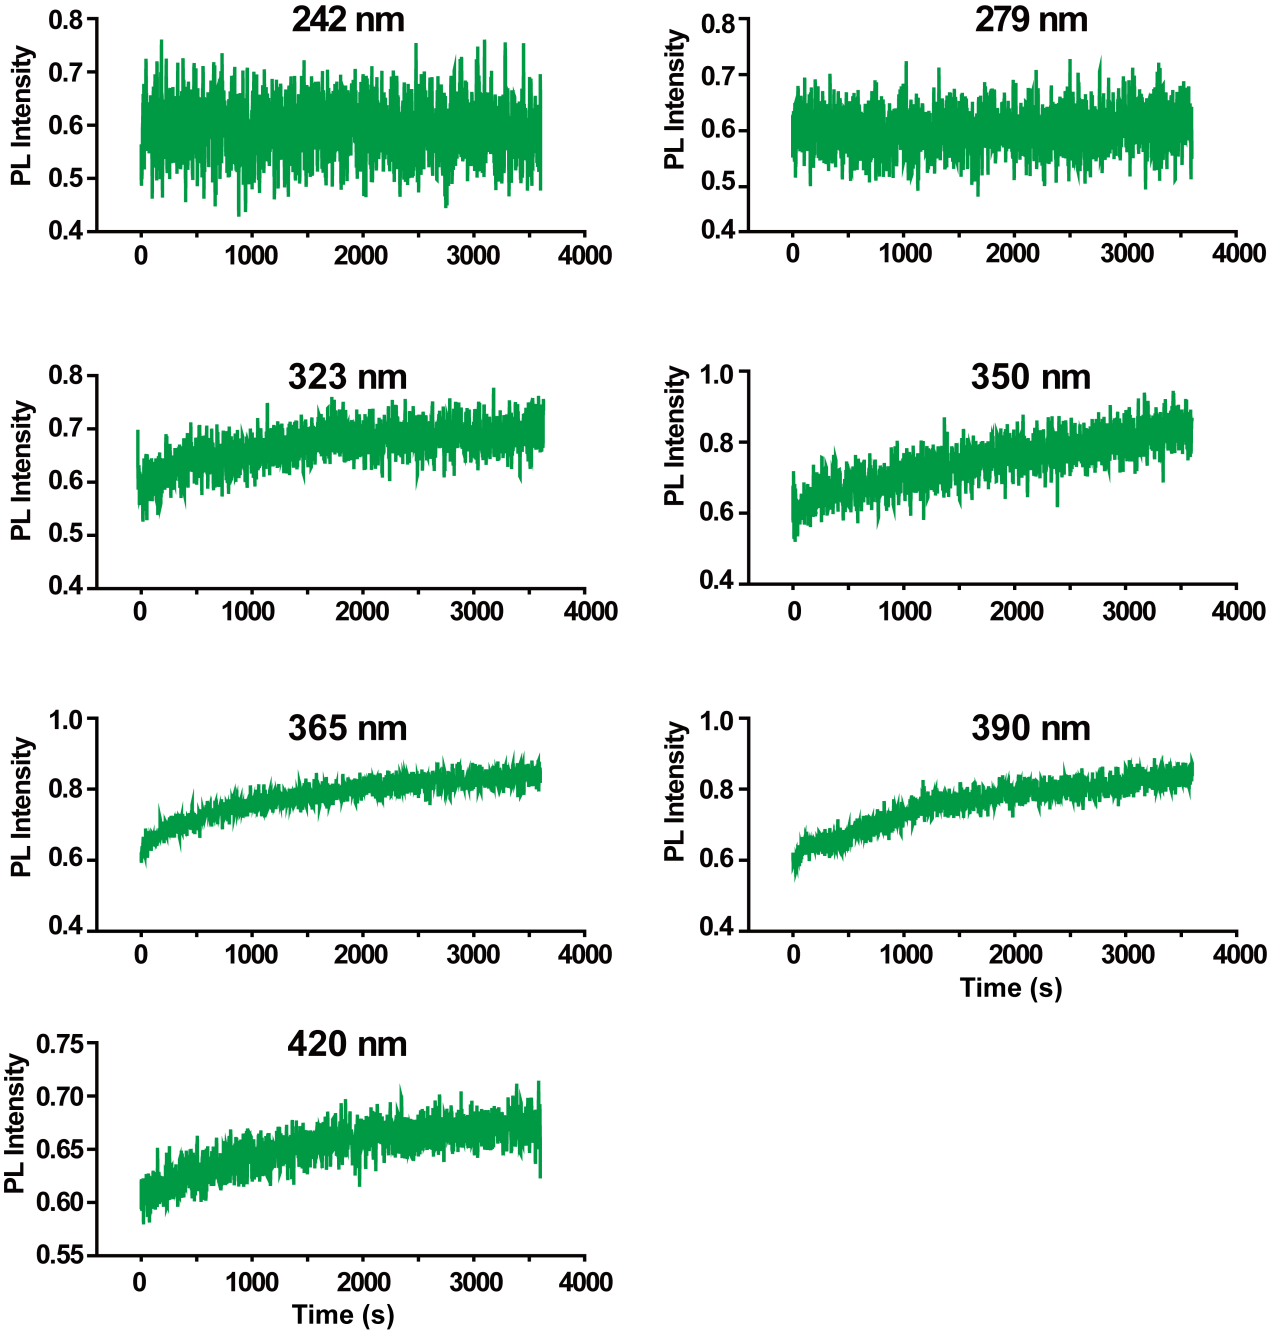


**Fig. S2** The effect of irradiation wavelength on the initial reaction system (Au(I)-HTT complex) during the first 3600 seconds. The PL intensities of the reaction system were significantly amplified under the light of 390 nm/365 nm/350 nm.


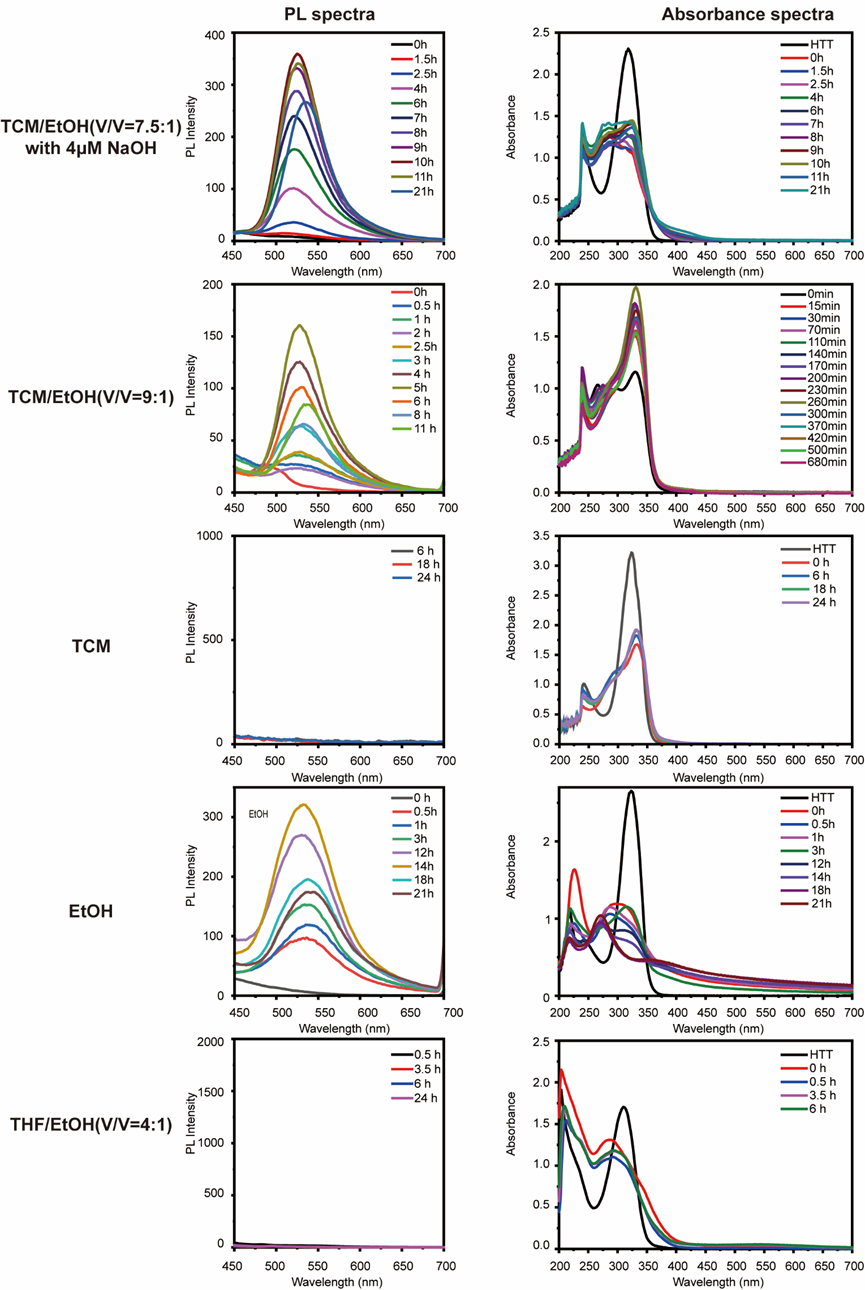


**Fig. S3** Photochemical synthesis of AuNPs under different solution conditions.


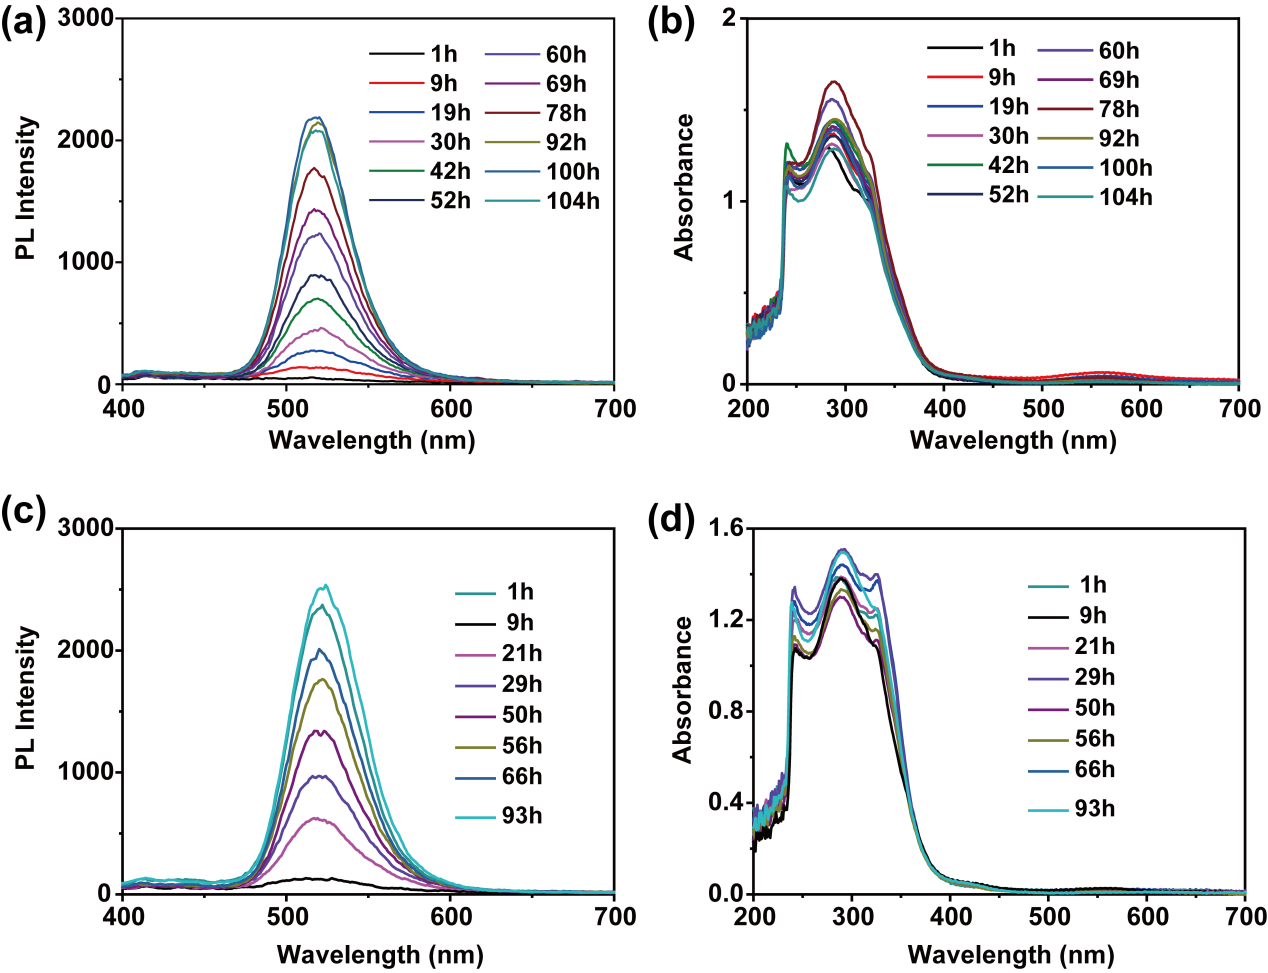


**Fig. S4 A** The dynamic PL spectra of L-AuNP@HTT at different reaction times under dark conditions. **b** The dynamic absorption spectra of L-AuNP@HTT at different reaction times under dark conditions. **c** The dynamic PL spectra of L-AuNP@HTT at different reaction times with incandescent lamp as the irridiation light. **d** The dynamic absorption spectra of L-AuNP@HTT at different reaction times with incandescent lamp as the irridiation light. For all these experiments, the alkaline TCM/EtOH (V:V=9:1) solution containing NaOH (4 μM) was used.


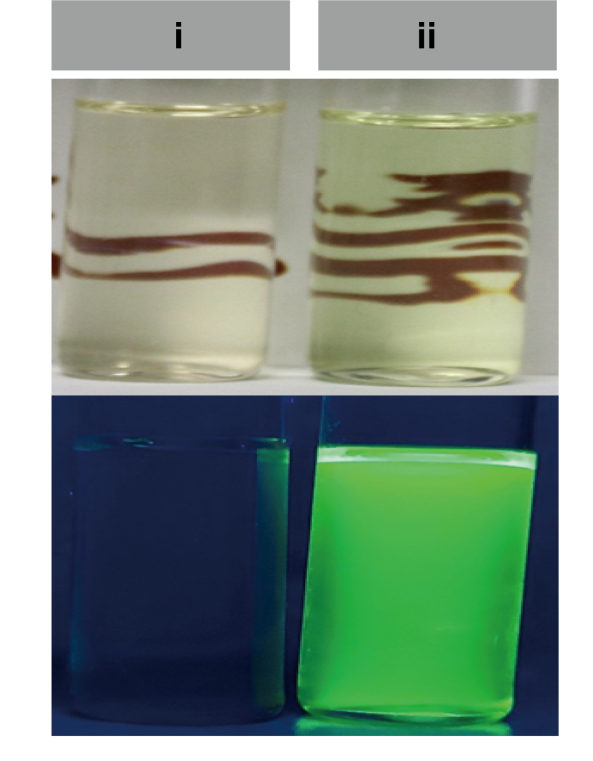


**Fig. S5** Pictures of Au(I)-HTT complex (i) and L-AuNP@HTT (ii) solutions under natural (top) and UV light (bottom).


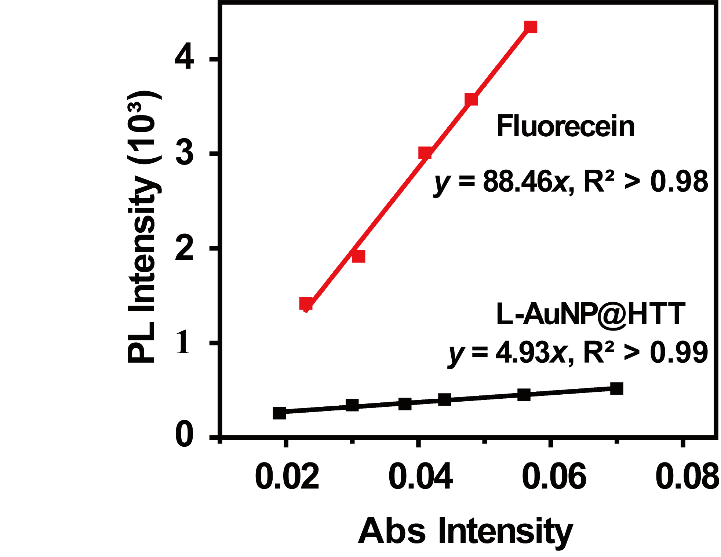


**Fig. S6** Relative *QY* determination of L-AuNP@HTT, with fluorescein as reference.


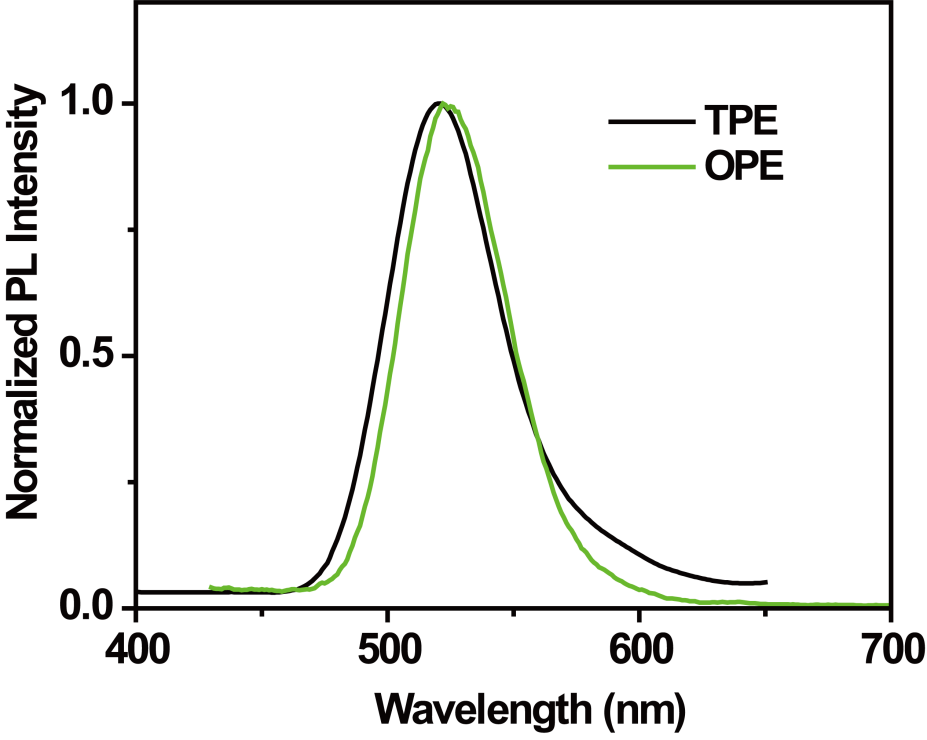


**Fig. S7** The PL spectra of L-AuNP@HTT under two-photon excitation (TPE) and one-photon excitation (OPE). TPE: 790 nm fs laser excitation; OPE: 405 nm excitation.


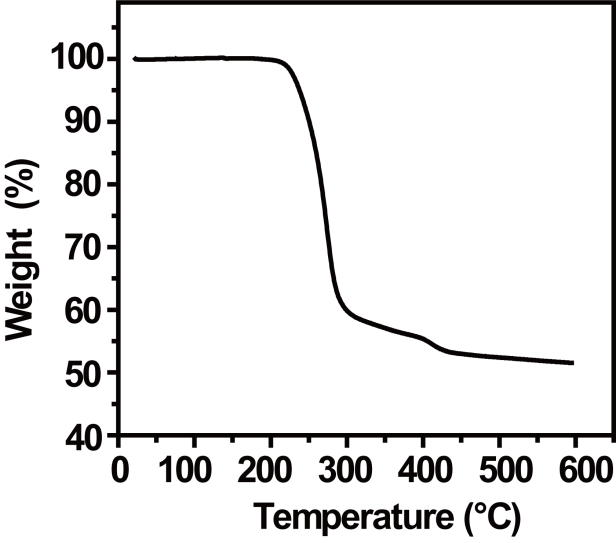


**Fig. S8** Thermal gravimetric analysis (TGA) of L-AuNP@HTT.


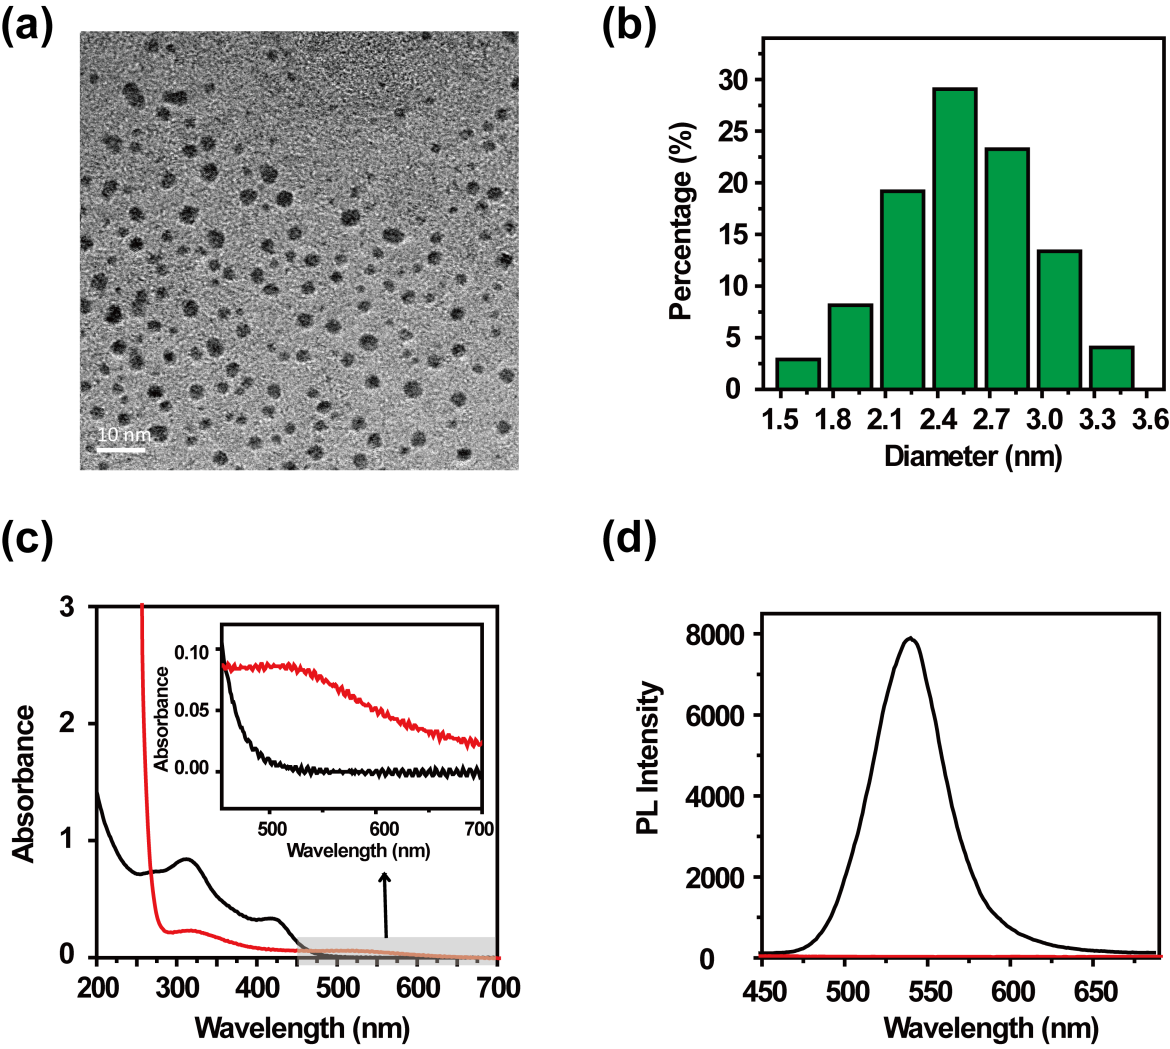


**Fig. S9** **A** TEM image of L-AuNP@MTY after DHLA exchange. **b** The size distribution histogram of L-AuNP@MTY after DHLA exchange. **c** Absorption spectra of L-AuNP@MTY before (black line) and after (red line) DHLA ligand exchange, the insert is an enlargement of the absorption spectra. **d** PL spectra of L-AuNP@MTY before (black) and after (red) DHLA-based ligand exchange.


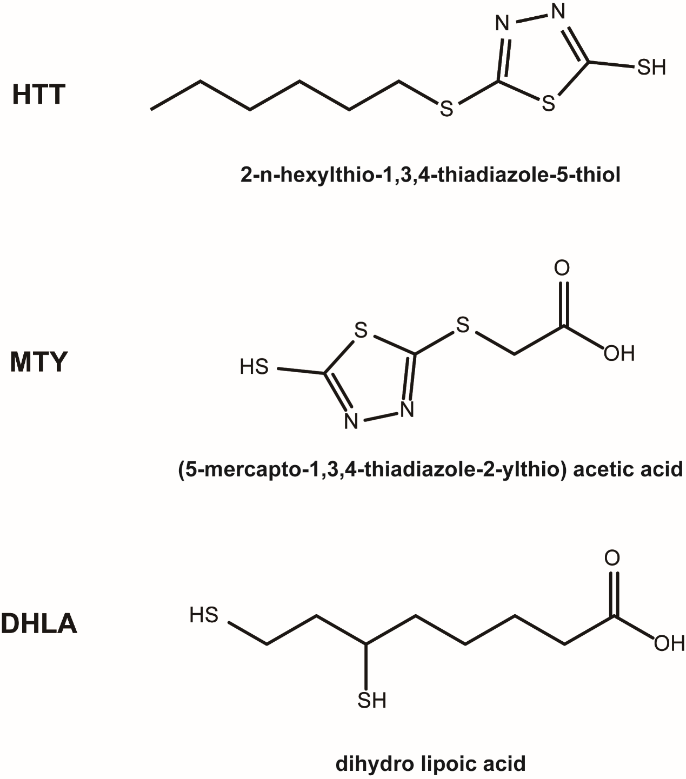


**Fig. S10** The molecular structure of HTT, MTY and DHLA.


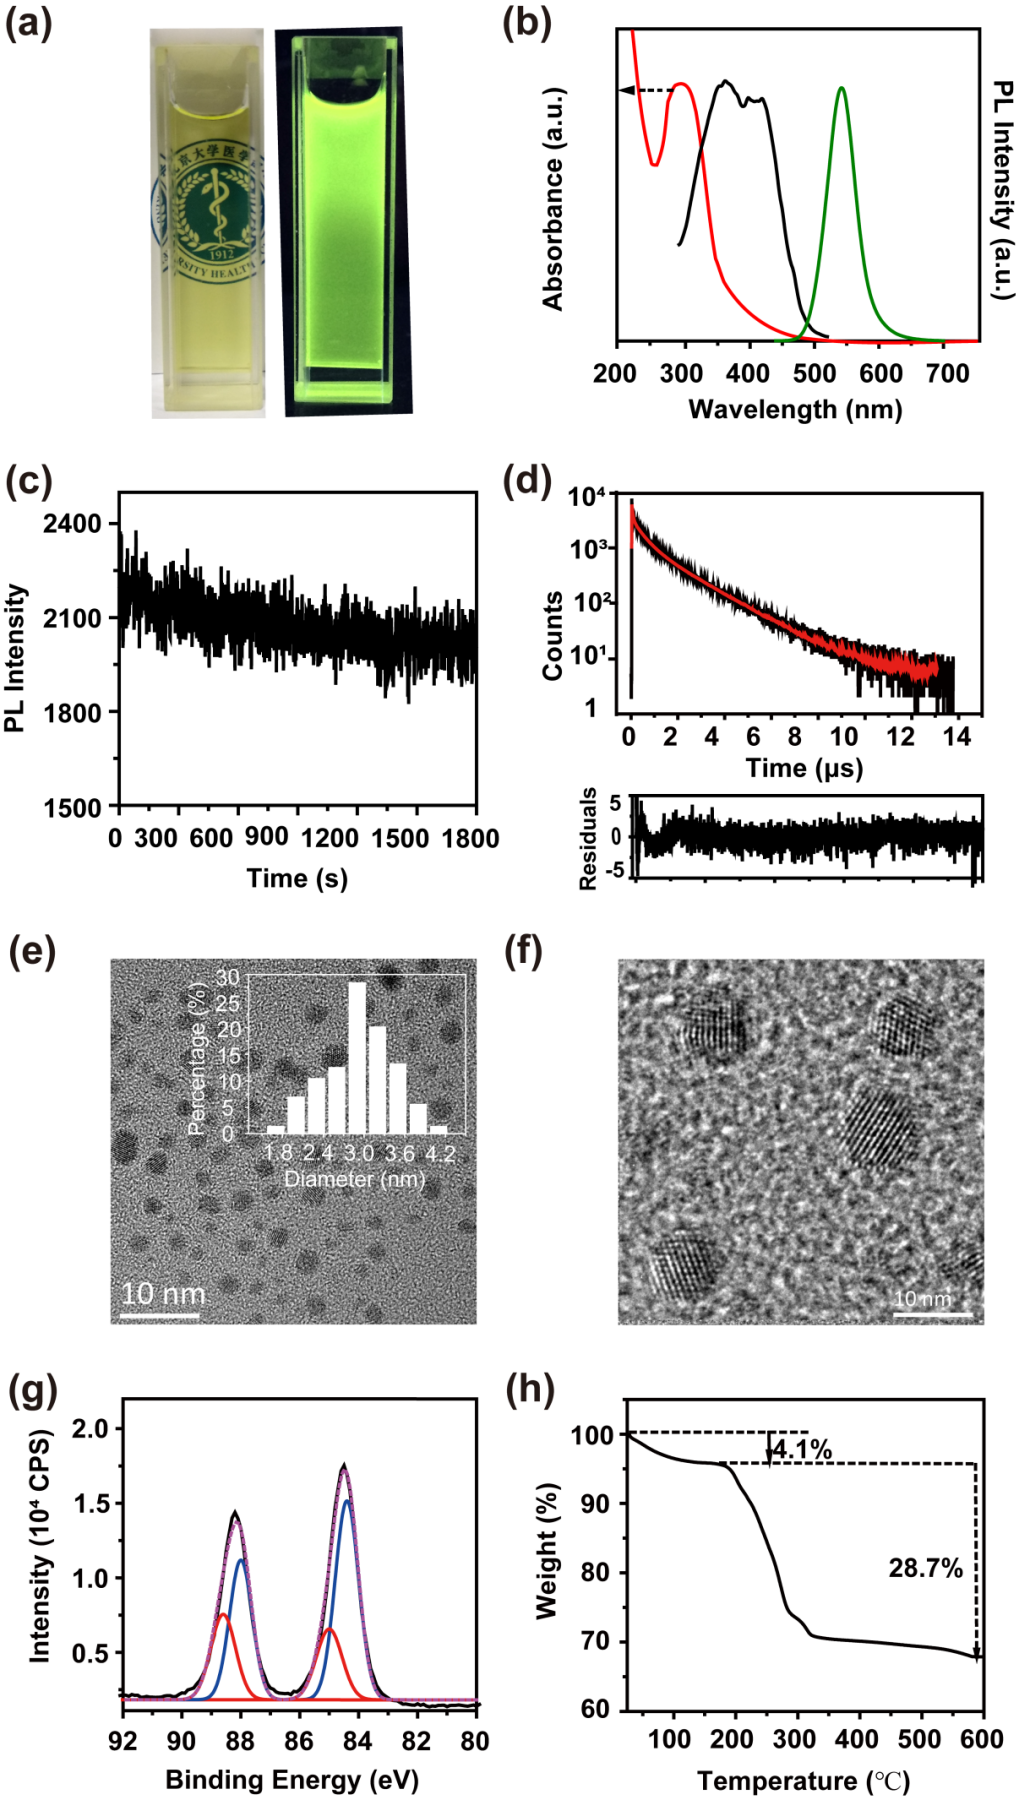


**Fig. S11 A** Photographs of L-AuNP@MTY under visible and UV light. **b** Absorbance (red line), excitation (black line, *λem* = 543 nm), and emission (green line, *λex* = 420 nm) spectra of L-AuNP@MTY. **c** Optical stability test: the PL intensity decreased by 8% under 405 nm continuous excitation for 1800 s using an F-4500 fluorescence spectrophotometer. It's supposed to photoinduced radicals affecting the PL. **d** PL decay curve and data fitting (*y* = -11.04 + 0.21exp (-*t*/*τ1*) + 0.15exp (-*t*/*τ2*), R2 = 0.96, *τ1* = 0.45 μs (30%), *τ2* = 1.74 μs (70%), *τmean* = 1.35 μs). **e**-**f** HRTEM images and size distribution histogram. **g** XPS spectra of Au 4f in L-AuNP@MTY (black), were deconvoluted into two distinct components (blue and red curves, the purple curve was the fitting curve), and about 29.4% of gold atoms were in Au(I) state. **h** TGA spectra of L-AuNP@MTY, the weight ratio of moisture content is 4.1%, and the weight ratio of MTY was 28.7% in L-AuNP@MTY.


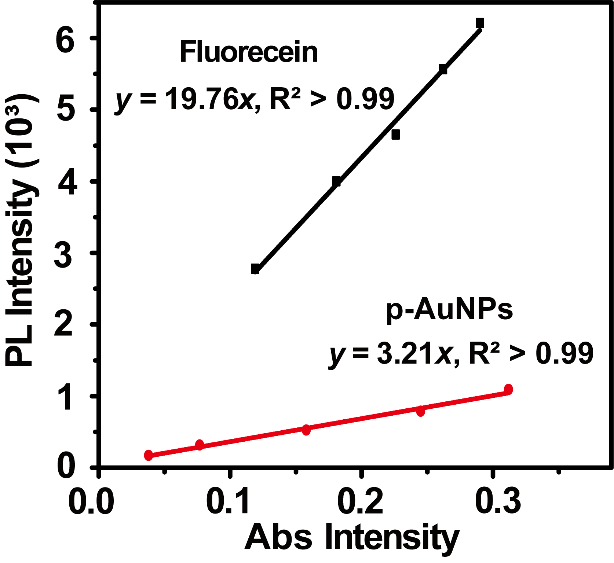


**Fig. S12** Relative QY determination of p-AuNPs, with fluorescein as reference.


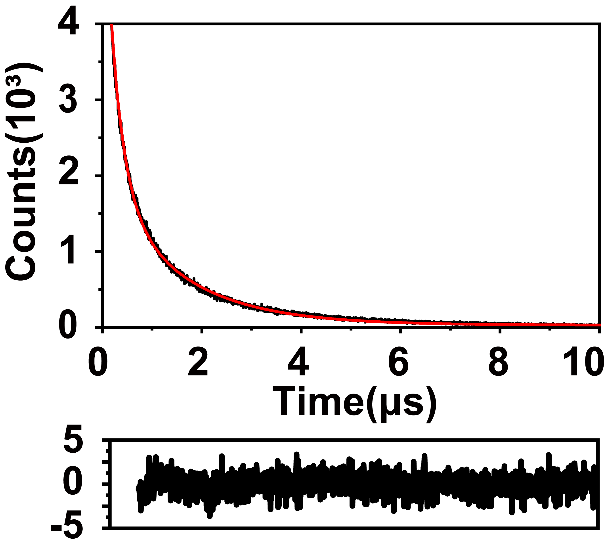


**Fig. S13** PL decay curve of p-AuNPs. The PL decay curve is analyzed by fitting the following equation: τ = τ1*0.09 + τ2*0.43 + τ3*0.48. with *τ*1 = 0.1 μs, *τ2* = 0.62 μs, *τ3* = 2.39 μs and R2 = 0.98. And the average lifetime *τ*mean can be evaluated using the following relation: *τmean* = 0.1* 0.09+ 0.62*0.43 + 2.39*0.48 = 1.41 μs.


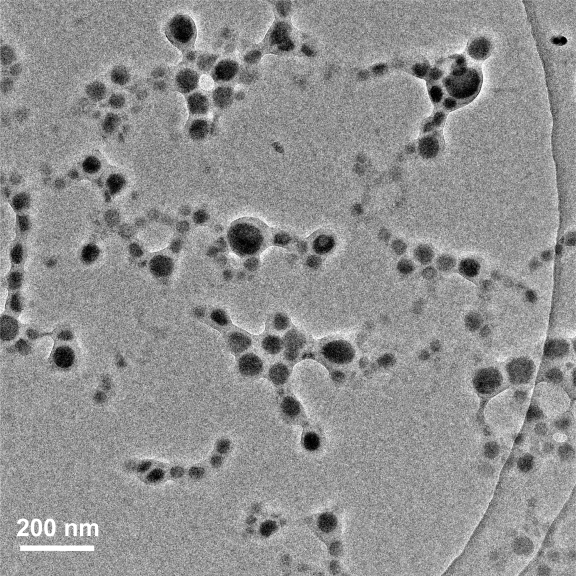


**Fig. S14** TEM of p-AuNPs.


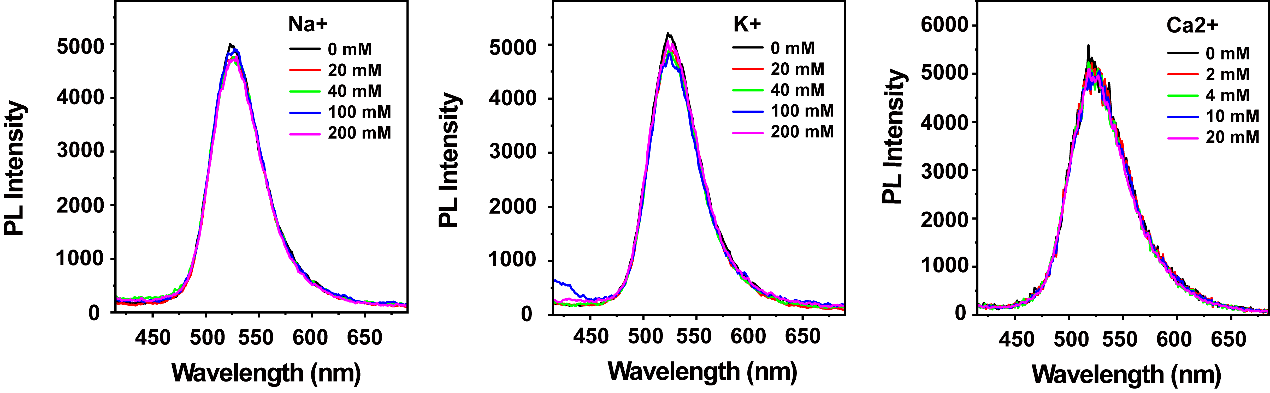


**Fig. S15.** The optical stability of p-AuNPs in high salt concentration solutions.


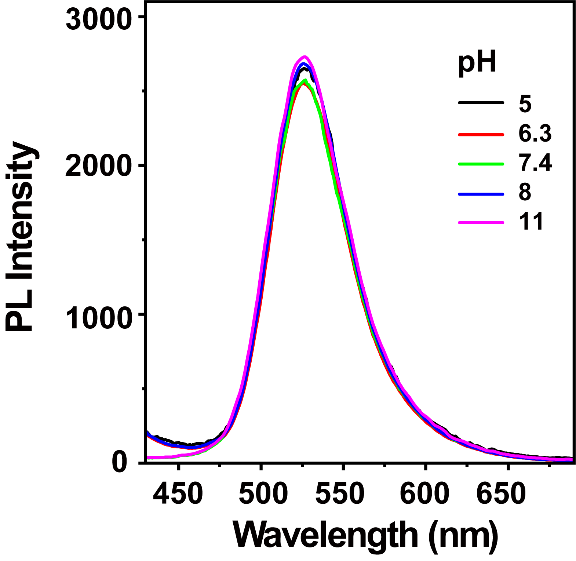


**Fig. S16**. The optical stability of p-AuNPs in a broad pH range.


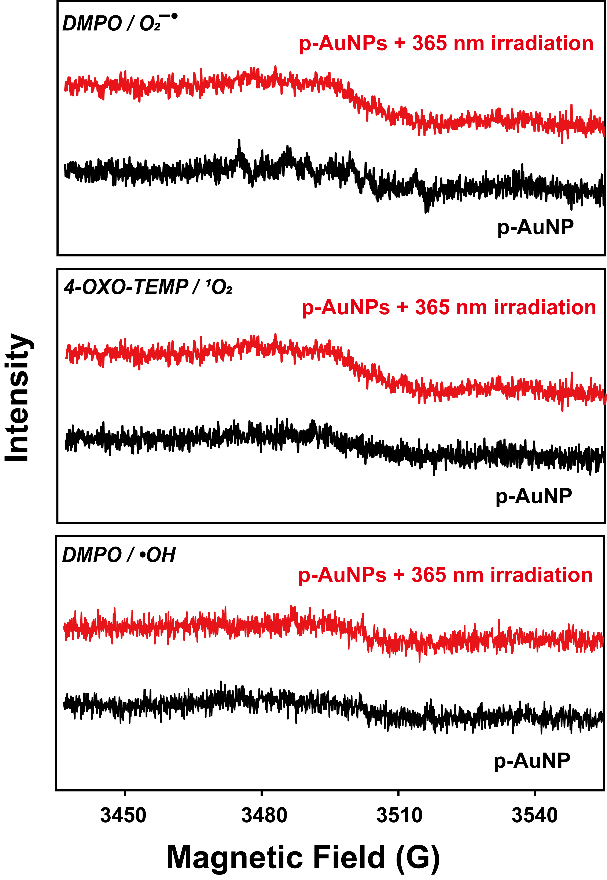


**Fig. S17.** Electron spin resonance (ESR) spectroscopy of p-AuNPs solution. The reactive oxygen species (ROS) signals of superoxide (O2-•), hydroxyl radical (•OH), and singlet oxygen (1O2) was not observed, demonstrating that p-AuNPs do not induce ROS generation. Conditions: ROS-sensitive trapping agents, 100 mM; p-AuNPs, 2 mg mL-1; 5min irradiation under 365 nm.

**
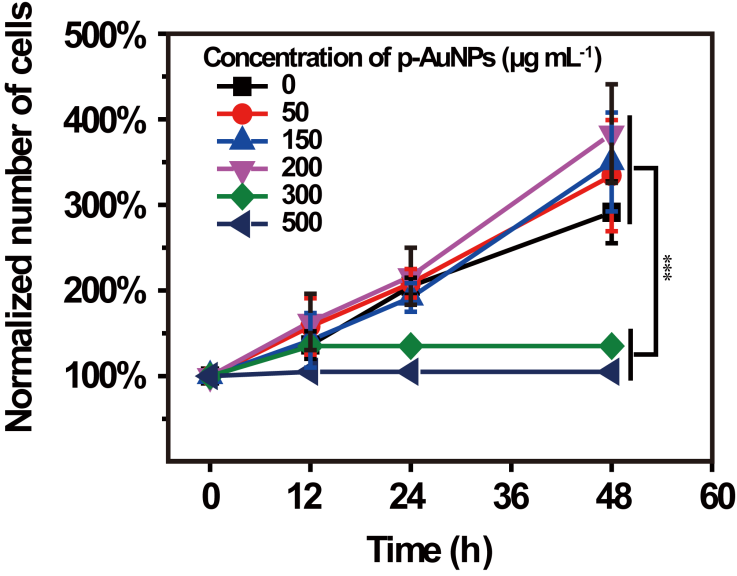
**

**Fig. S18** Growth curves of HepG2 cells under different concentrations of p-AuNPs. The data were analyzed by two-tailed t-test (****p* < 0.001).

**References**

1. Xu, C.; Webb, W. W. (1996) Measurement of two-photon excitation cross sections of molecular fluorophores with data from 690 to 1050 nm.J. Opt. Soc. Am. B13: 481-491.
2. Wang, Z.; Wang, X.; Zhao, J.; Jiang, W.; Yang, P.; Fang, X.; Zhou, M.; Cheng, M. (2008) Cooperative enhancement of two-photon absorption based on electron coupling in triphenylamine-branching chromophore. Dyes Pigm 79: 145-152.
3. Eaton, D. F. (1988) Reference materials for fluorescence measurement. Pure Appl. Chem 60: 1107-1114.
4. Alvarez, M. M.; Khoury, J. T.; Schaaff, T. G.; Shafigullin, M. N.; Vezmar, I.; Whetten, R. L. (1997) Optical absorption spectra of nanocrystal gold molecules. J. Phys. Chem. B101: 3706-3712.
5. Wilcoxon, J. P.; Martin, J. E.; Parsapour, F.; Wiedenman, B.; Kelley, D. F. (1998) Photoluminescence from nanosize gold clusters. J. Chem. Phys 108: 9137-9143.
6. Huang, C. C.; Liao, H. Y.; Shiang, Y. C.; Lin, Z. H.; Yang, Z.; Chang, H. T. (2009) Synthesis of wavelength-tunable luminescent gold and gold/silver nanodots. J. Mater. Chem19: 755-759.
7. Yu, M.; Zhou, C.; Liu, J.; Hankins, J. D.; Zheng, J. (2011) Luminescent gold nanoparticles with pH-dependent membrane adsorption. J. Am. Chem. Soc 133: 11014-11017.
8. Tu, X.; Chen, W.; Guo, X. (2011) Facile one-pot synthesis of near-infrared luminescent gold nanoparticles for sensing copper (II). Nanotechnology 22: 095701.
9. Liu, J.; Yu, M.; Ning, X.; Zhou, C.; Yang, S.; Zheng, J. (2013) PEGylation and zwitterionization: pros and cons in the renal clearance and tumor targeting of near‐IR‐emitting gold nanoparticles. Angew. Chem 125, 12804-12808.
10. Liu, J.; Duchesne, P. N.; Yu, M.; Jiang, X.; Ning, X.; Vinluan III, R. D.; Zhang P.; Zheng, J. (2016) Luminescent gold nanoparticles with size‐independent emission. Angew. Chem 128: 9040-9044.
11. Tang, S.; Peng, C.; Xu, J.; Du, B.; Wang, Q.; Vinluan III, R. D.; Yu, M.; Kim, M.; Zheng, J. (2016) Tailoring renal clearance and tumor targeting of ultrasmall metal nanoparticles with particle density. Angew. Chem 128: 16273-16277.
12. Yu, M.; Xu, J.; Zheng, J. (2019) Renal clearable luminescent gold nanoparticles: from the bench to the clinic. Angew. Chem., Int. Ed 58: 4112-4128.
13. Gong, L.; Chen, Y.; He, K.; Liu, J. (2019) Surface coverage-regulated cellular interaction of ultrasmall luminescent gold nanoparticles. ACS nano 13: 1893-1899.
14. Chen, Y.; Li, L.; Gong, L.; Zhou, T.; Liu, J. (2019) Surface regulation towards stimuli‐responsive luminescence of ultrasmall thiolated gold nanoparticles for ratiometric imaging. Adv. Funct. Mater 29: 1806945.
15. Wei, M.; Tian, Y.; Wang, L.; Hong, Y.; Luo, D.; Sha, Y. (2021) The emission mechanism of gold nanoclusters capped with 11-mercaptoundecanoic acid, and the detection of methanol in adulterated wine model. Materials 14: 6342.
16. Tan, Y.; Chen, M.; Chen, H.; Wu, J.; Liu, J. (2021) Enhanced ultrasound contrast of renal‐clearable luminescent gold nanoparticles.Angew. Chem., Int. Ed 60: 11713-11717.
17. He, K.; Tan, Y.; Zhao, Z.; Chen, H.; Liu, J. (2021) Weak anchoring sites of thiolate‐protected luminescent gold nanoparticles. Small 17: 2102481.
18. Qu, G.; Jiang, T.; Liu, T.; Ma, X. (2021) Multifunctional host polymers assist au nanoclusters achieve high quantum yield and mitochondrial imaging. ACS Appl. Mater. Interfaces 14(1): 2023-2028
19. Tahir, Freire Jr F L, Aucelio R Q, et al. (2023) Quenching of the photoluminescence of gold nanoclusters synthesized by pulsed laser ablation in water upon interaction with toxic metal species in aqueous solution. Chemosensors 11(2): 118.
20. Yang T, Zhou J, Shan B, et al. (2023) Formation of multiple emission centers of gold nanoclusters during the aggregation-induced emission process.ACS Appl. Nano Mater 6(19): 17924-17931.
